# Supplementary material for: Neuroimmune proteins can differentiate between tauopathies
Source: Springer Nature journal article supplement (doi:10.1186/s12974-022-02640-6), 2022-11-19

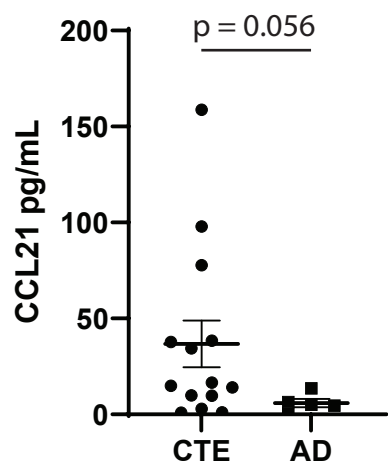

Supplement: MOESM1 [file 23730726]
